# Supplementary material for: Synthesis of ZIF-67 nanocubes with complex structures co-mediated by dopamine and polyoxometalate
Source: Royal Society of Chemistry journal article supplement (doi:10.1039/c8ta07080f), 2018-01-01
Supplement: c8ta07080f1.pdf [file c8ta07080f1.pdf]

## Electronic Supplementary Information

### ZIF-67 Nanocubes with Complex Structures Co-mediated by Dopamine and Polyoxometalate

Hao Bin Wu,<sup>a</sup> Bu Yuan Guan,<sup>b</sup> Peilei He,<sup>b,\*</sup> and Xin-Yao Yu<sup>a,\*</sup>

<sup>a</sup>School of Materials Science & Engineering, Zhejiang University, Hangzhou 310027, (P. R. China)

Email: yuxinyao@zju.edu.cn

<sup>b</sup>School of Chemical and Biomedical Engineering, Nanyang Technological University, 62 Nanyang Drive, Singapore 637459 (Singapore)

Email: peileihe@gmail.com

### Experimental section

*Synthesis of ZIF-67 nanocubes.* The ZIF-67 nanocubes were synthesized according to the reference (*Chem* **2016**, *1*, 102). In a typical synthesis, 58 mg of  $\text{Co}(\text{NO}_3)_2 \cdot 6\text{H}_2\text{O}$  was dissolved in 2 mL of deionized water containing 1 mg of cetrimonium bromide (CTAB). Then this solution was rapidly injected into 14 mL of aqueous solution containing 908 mg of 2-methylimidazole and stirred at room temperature for 20 min. The product was collected by centrifugation and washed by ethanol for six times.

*Synthesis of ZIF-67 nanoscaffolds.* First, 15 mg of ZIF-67 nanocubes and 5 mg of dopamine were dispersed into a Tris-buffer solution (10 mL, 10 mM) with magnetic stirring. Then a  $\text{H}_3\text{PMo}_{12}\text{O}_{40}$  solution (5 mL, 20 mg) was added. Finally, the mixture was stirred for 10 min. The resultant product was collected via centrifugation and washed three times with ethanol.

*Synthesis of ZIF-67 magic nanocubes.* First, 45 mg of ZIF-67 nanocubes and 2.5 mg of dopamine were dispersed into a Tris-buffer solution (5 mL, 10 mM). Then a solution of  $\text{H}_3\text{PMo}_{12}\text{O}_{40}$  (2.5 mL, 10 mg) was added. Finally, the mixture was stirred for 30 min. The resultant product was collected via centrifugation and washed three times with ethanol.

*Synthesis of PDA@ZIF-67 nanocubes.* 15 mg of ZIF-67 nanocubes and 5 mg of dopamine were dispersed into a Tris-buffer solution (10 mL, 10 mM) with magnetic stirring for 15 min. The resultant

product was collected via centrifugation and washed three times with ethanol.

*Synthesis of POM-PDA hollow nanospheres.* The sample was prepared by adding 1 mL of  $\text{H}_3\text{PMo}_{12}\text{O}_{40}$  aqueous solution (10 mg/mL) to 0.8 mL of dopamine aqueous solution (2.5 mg/mL). The transparent solution became green immediately and showed turbid within 2 min. After aging for 12 h, the yellow precipitation was collected by removing upper-phase, washing with ethanol for three times.

*Synthesis of CoMoSe@C nanoscaffolds.* The as prepared POM&PDA@ZIF-67 nanoscaffolds were further annealed with Se powder at 600 °C for 2 h with a ramping rate of 10 °C min<sup>-1</sup> under a flow of nitrogen gas.

*Synthesis of CoSe<sub>2</sub>@C nanoboxes.* The as prepared PDA@ZIF-67 nanoboxes were further annealed with Se powder at 600 °C for 2 h with a ramping rate of 10 °C min<sup>-1</sup> under a flow of nitrogen gas.

*Synthesis of MoSe<sub>2</sub>@C hollow nanospheres.* The as prepared POM-PDA hollow nanospheres were further annealed with Se powder at 600 °C for 2 h with a ramping rate of 10 °C min<sup>-1</sup> under a flow of nitrogen gas.

*Materials characterizations.* The morphologies of the products were characterized by field-emission scanning electron microscope (FESEM; JEOL-6700F) and transmission electron microscope (TEM; JEOL, JEM-1400). The composition of the samples was characterized by Energy-dispersive X-ray spectroscopy (EDX) attached to the FESEM. X-ray diffraction (XRD) patterns of the products were collected on a Bruker D2 Phaser X-Ray Diffractometer with Cu K $\alpha$  radiation ( $\lambda = 1.5406 \text{ \AA}$ ). HRTEM images, HAADF-STEM images and elemental mapping were collected using a TEM (JEOL, JEM-2100F) equipped with EDX spectroscopy. Raman spectra were collected on a Renishaw Invia Reflex Raman microscope equipped with a 514 nm excitation laser.

*Electrochemical measurements.* The electrode film was prepared by pasting the slurry containing 80 wt.% of active materials (CoMoSe@C nanoscaffold, CoSe<sub>2</sub>@C nanoboxes, or MoSe<sub>2</sub>@C hollow nanospheres), 10 wt.% of conductive carbon (super-P) and 10 wt.% sodium carboxymethyl cellulose (NaCMC) binder onto a copper foil. The electrode film was dried in a vacuum oven at 80 °C overnight. The average areal mass loading of the active materials on electrodes was about 1.0 mg cm<sup>-2</sup>. The 2032-type coin cells were assembled using Celgard 2300 membrane as separator. The electrolyte was a 1.0 M LiPF<sub>6</sub> in a mixture of ethylene carbonate and diethyl carbonate (1: 1 by vol.) solution. Lithium thin disks were used as counter electrodes. All the cells were assembled in an argon-filled glovebox with

content of water/oxygen below 1.0 ppm. The galvanostatic charge/discharge tests were conducted over a voltage range of 0.01-3.0 V versus Li/Li<sup>+</sup> on a LAND battery tester. Cyclic voltammetry (CV) tests were conducted on a CHI 660D electrochemical workstation. Electrochemical impedance spectroscopy (EIS) measurements were performed over the frequency range of 100,000 Hz to 0.1 Hz.

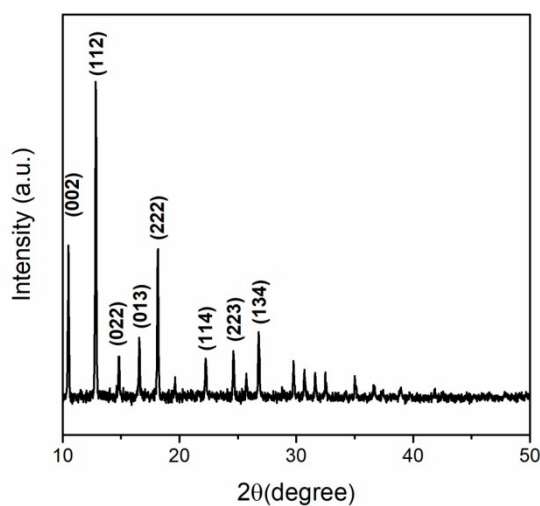

**Fig. S1** XRD pattern of ZIF-67 nanocubes

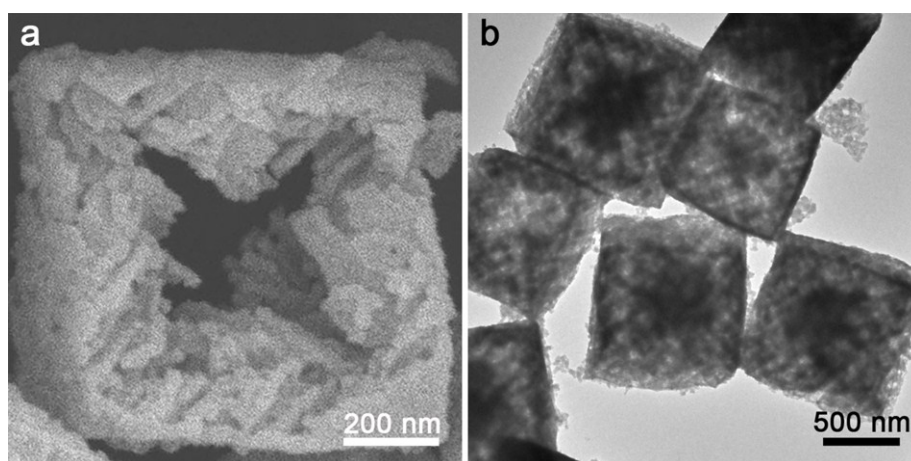

**Fig. S2** (a) FESEM and (b) TEM images of the ZIF-67 nanoscaffolds.

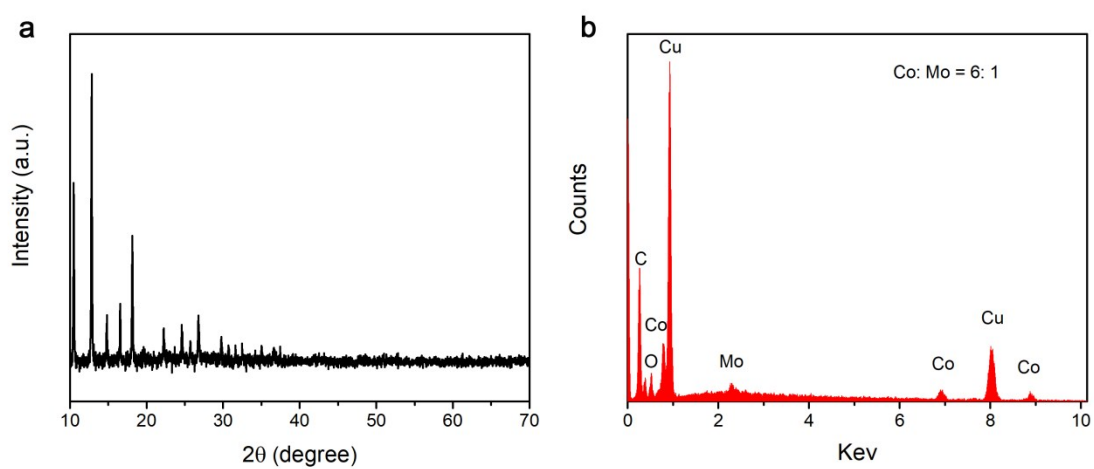

**Fig. S3** (a) XRD pattern and (b) EDX spectrum of the ZIF-67 nanoscaffolds.

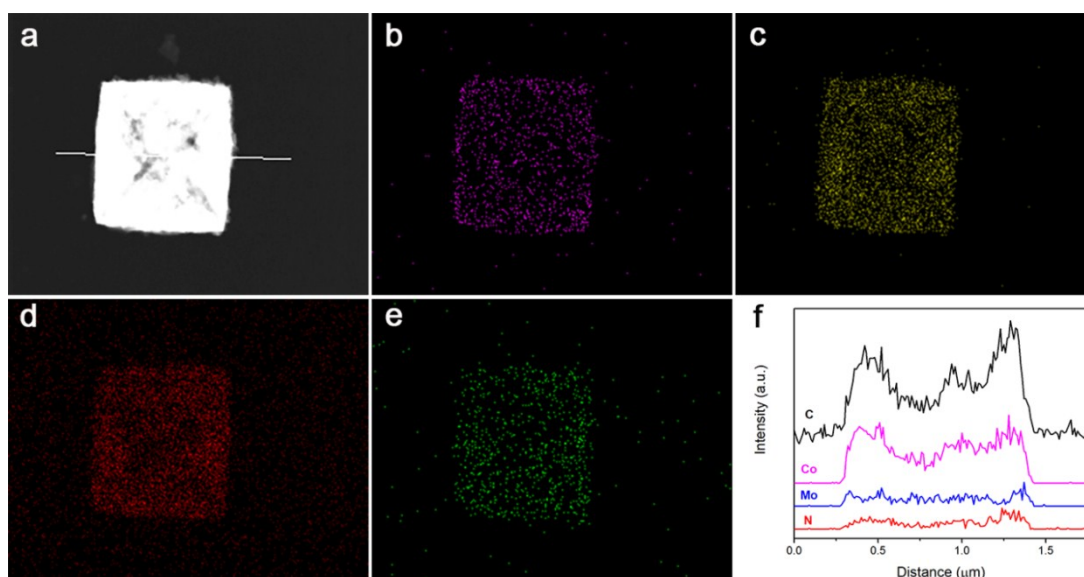

**Fig. S4** (a) HAADF-STEM image of a ZIF-67 nanoscaffold, elemental mapping images of Co (b), Mo (c), C (d), and N (e) of the nanoscaffold show in (a), (f) elemental line scan of the nanoscaffold show in (a).

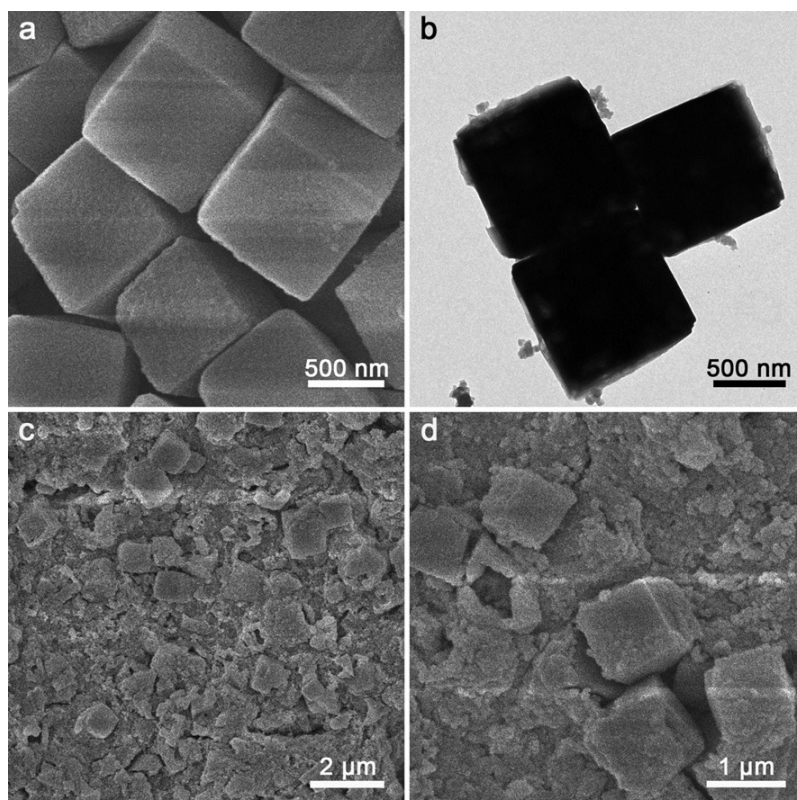

**Fig. S5** (a) FESEM and (b) TEM images of the product (PDA@ZIF-67 nanocubes) without the addition of POM. (c,d) FESEM images of the product without the addition of dopamine.

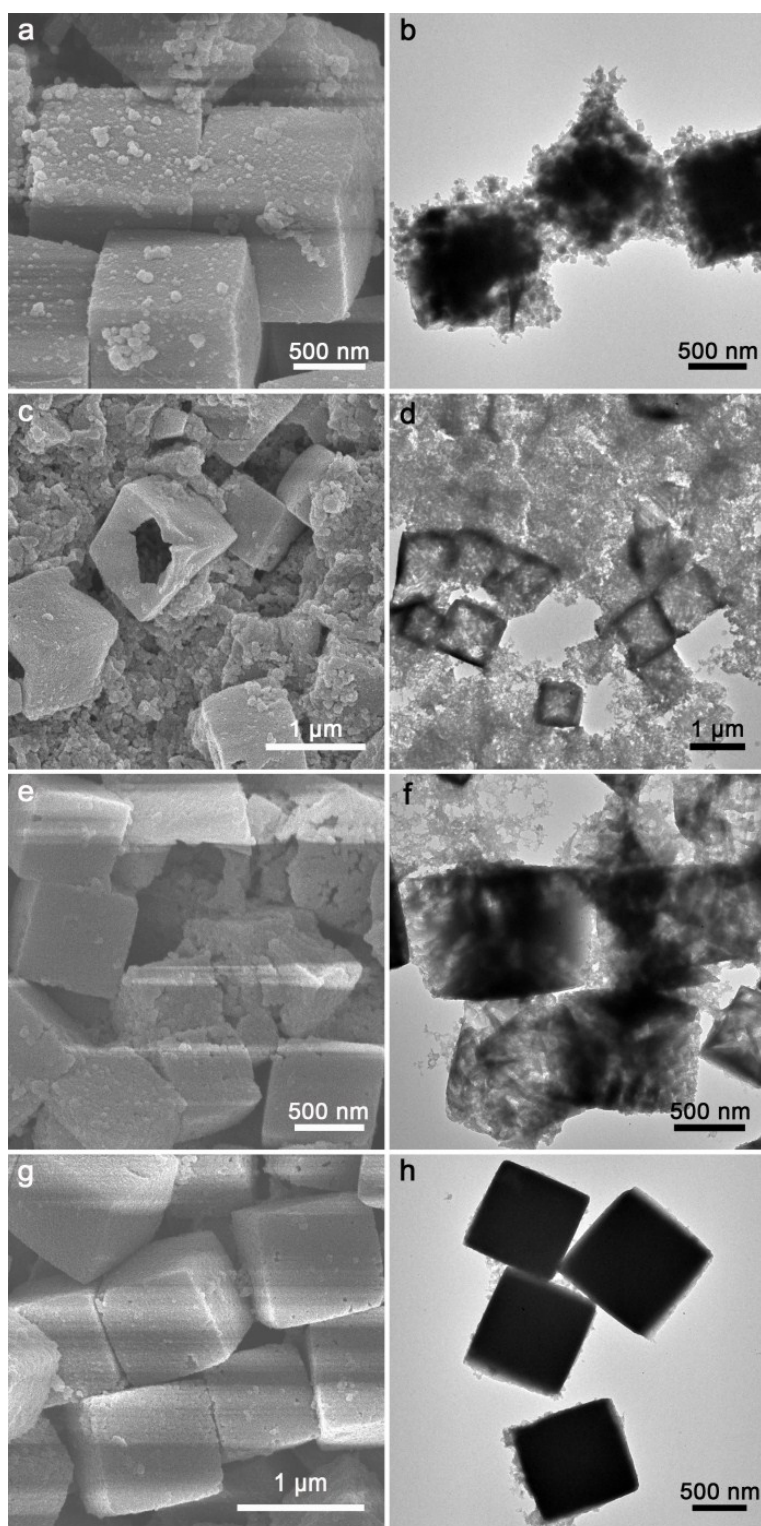

**Fig. S6** (a, c, e, g) FESEM and (b, d, f, h) TEM images of the products with different contents of dopamine (DA) and POM. (a-b, 5 mg DA, 10 mg POM; c-d, 5 mg DA, 40 mg POM; e-f, 2.5 mg DA, 20 mg POM; g-h, 10 mg DA, 20 mg POM).

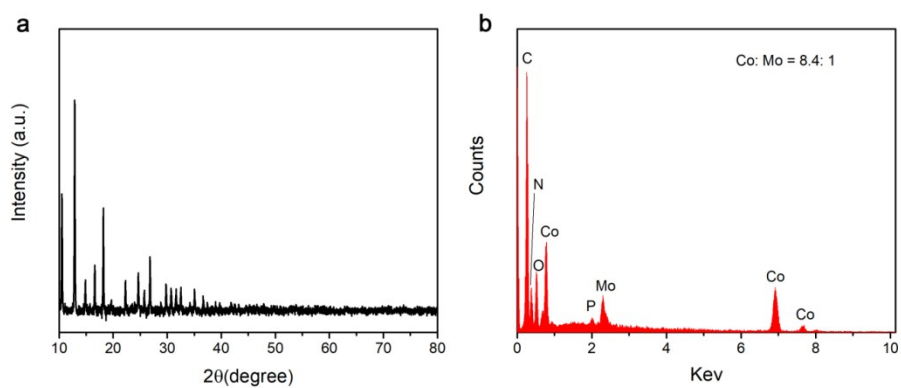

**Fig. S7** (a) XRD pattern and (b) EDX spectrum of the ZIF-67 magic nanocubes.

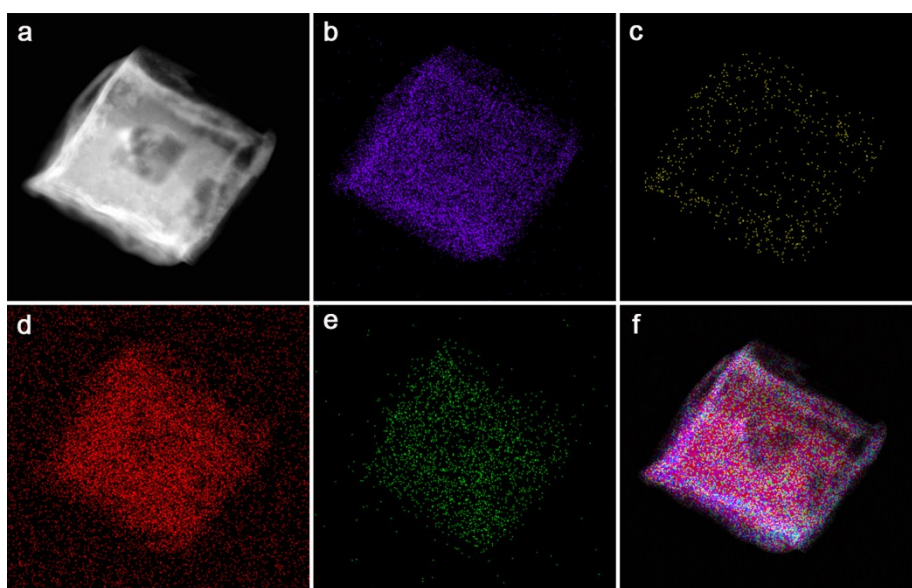

**Fig. S8** (a) HAADF-STEM image of a ZIF-67 magic nanocube, elemental mapping images of Co (b), Mo (c), C (d), N (e), and overlap (f) of the magic cube show in (a).



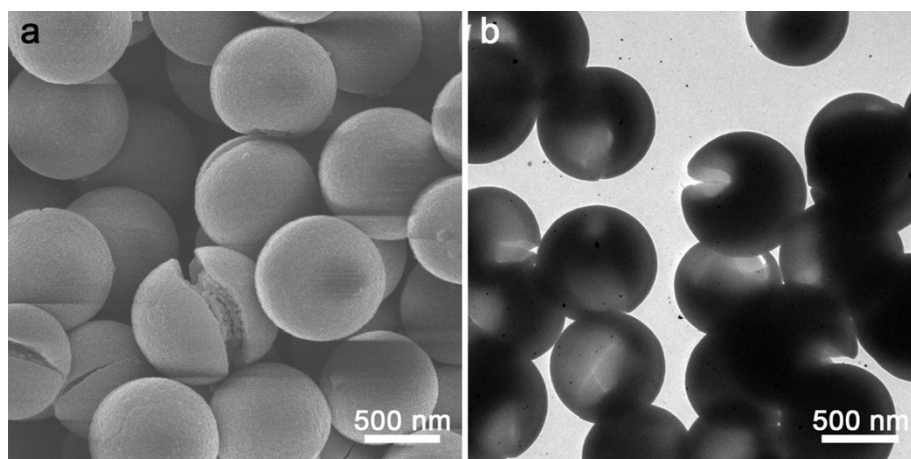

**Fig. S9** (a) FESEM and (b) TEM images of the PDA-POM nanospheres.

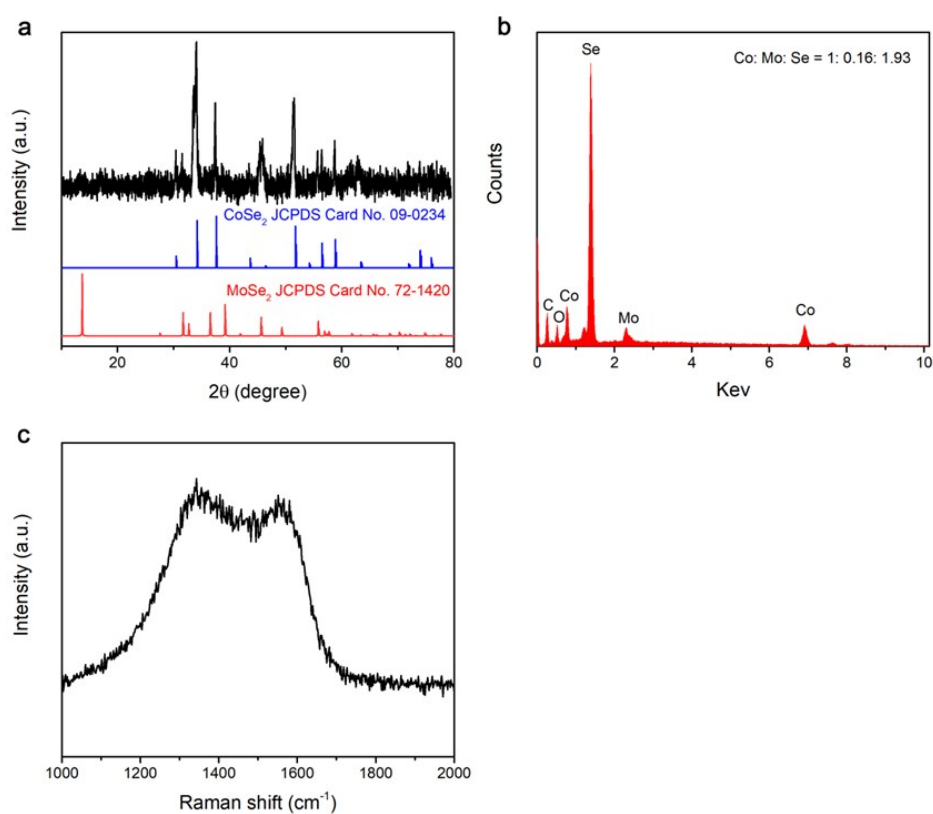

**Fig. S10** (a) XRD pattern, (b) EDX spectrum, and (c) Raman spectrum of the CoMoSe@C nanoscaffolds.



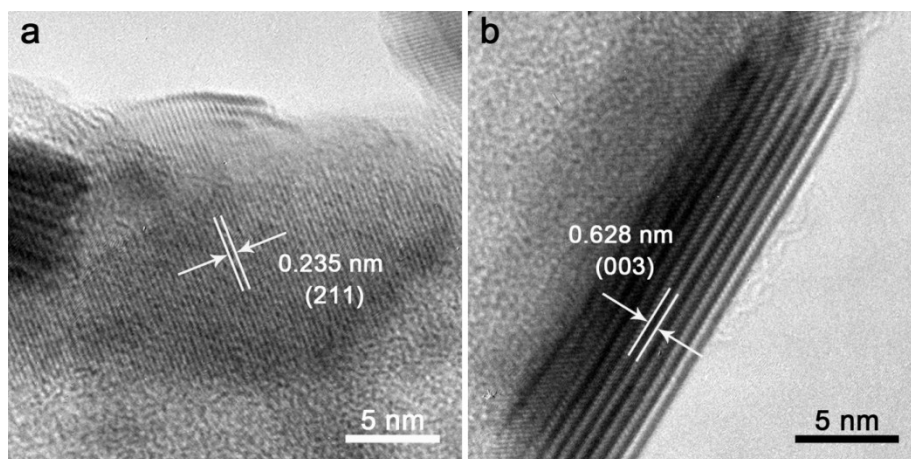

**Fig. S11** (a,b) HRTEM images of the CoMoSe@C nanoscaffold.

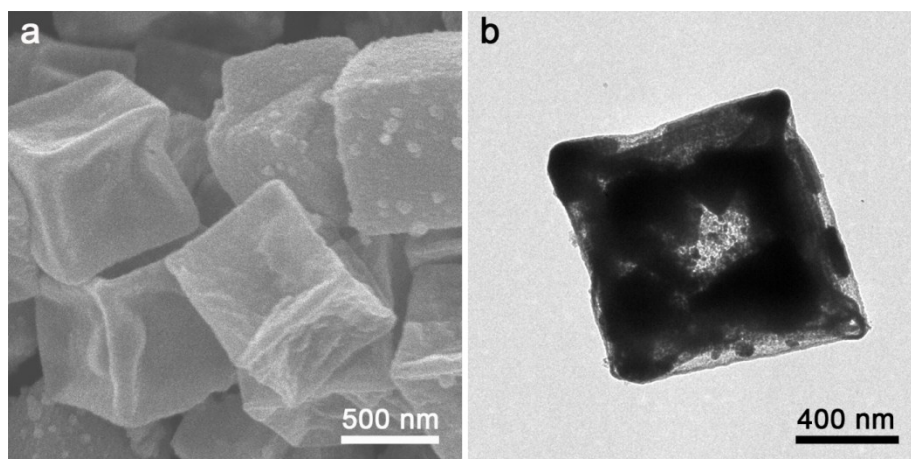

**Fig. S12** (a) FESEM and (b) TEM images of the CoSe<sub>2</sub>@C nanoboxes.

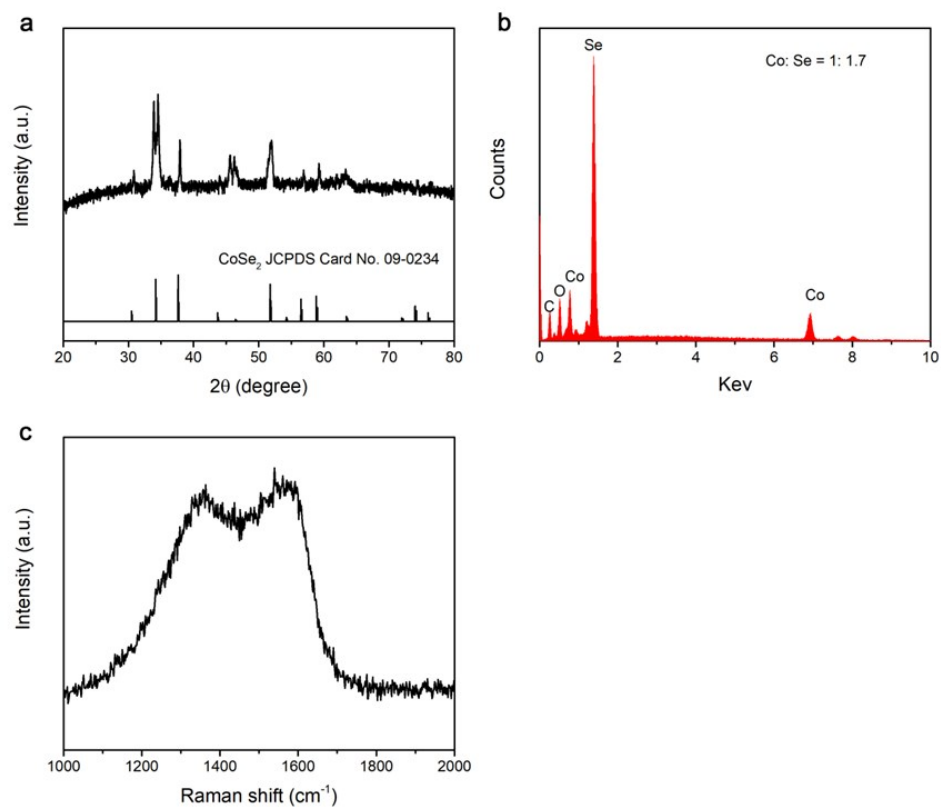

**Fig. S13** (a) XRD pattern, (b) EDX spectrum, and (c) Raman spectrum of the  $\text{CoSe}_2@\text{C}$  nanoboxes.

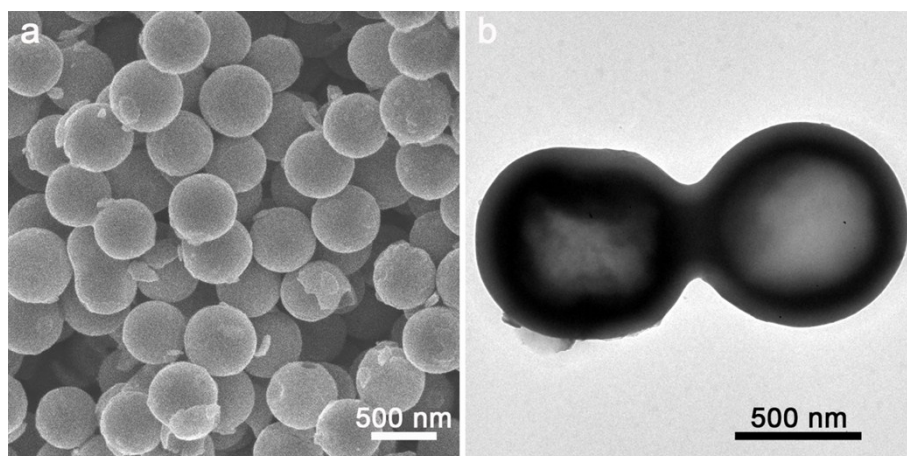

**Fig. S14** (a) FESEM and (b) TEM images of the  $\text{MoSe}_2@\text{C}$  hollow nanospheres.

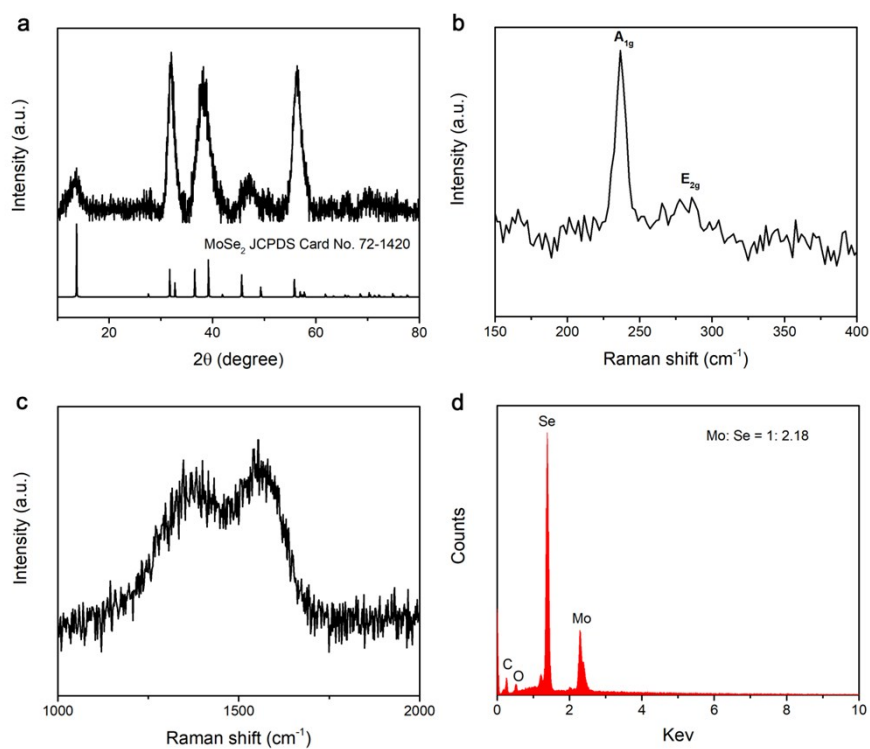

**Fig. S15** (a) XRD pattern, (b,c) Raman spectrum, and (d) EDX spectrum of the MoSe<sub>2</sub>@C hollow nanospheres.

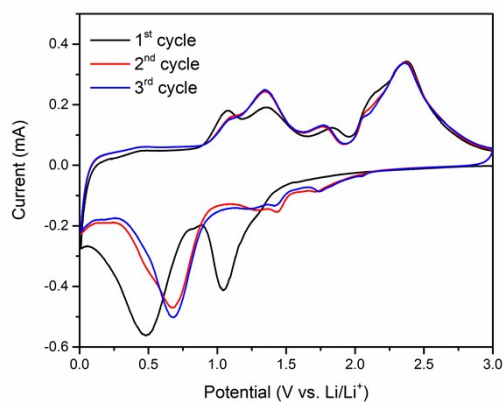

**Fig. S16** CV curves of the CoMoSe@C nanoscaffolds in the voltage window of 0.0- 3.0 V vs. Li/Li<sup>+</sup> at a scan rate of 0.2 mV s<sup>-1</sup>.

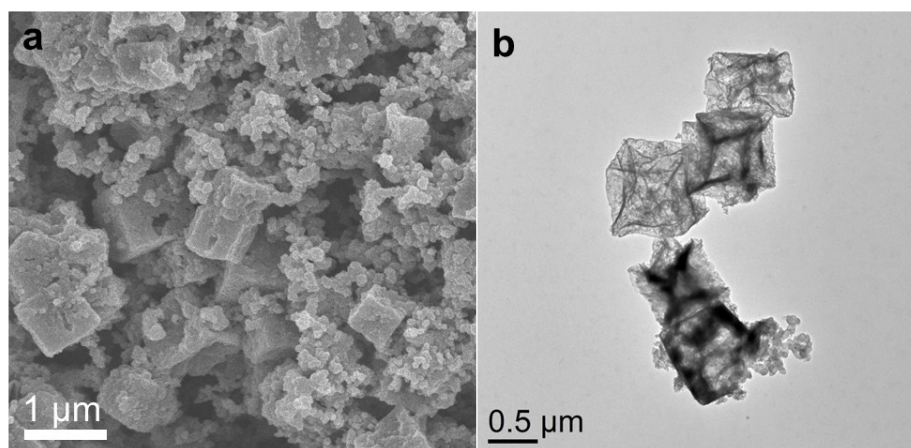

**Fig. S17** (a) FESEM and (b) TEM images of the CoMoSe@C nanoscaffolds after cycling test.

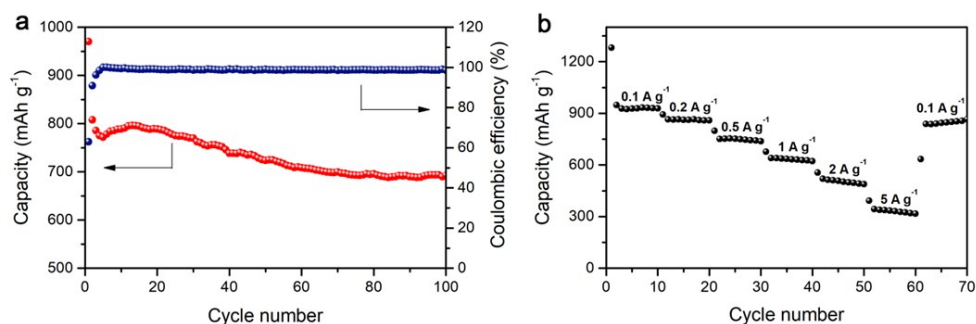

**Fig. S18** (a) Cycling performance and (b) rate capability of the CoSe<sub>2</sub>@C nanoboxes.

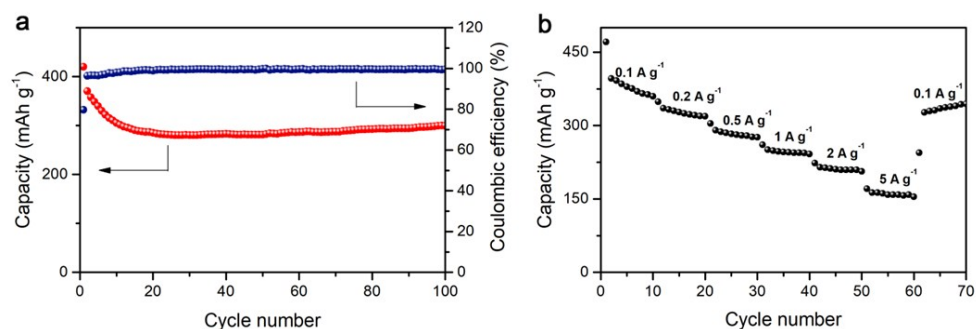

**Fig. S19** (a) Cycling performance and (b) rate capability of the MoSe<sub>2</sub>@C hollow nanospheres.

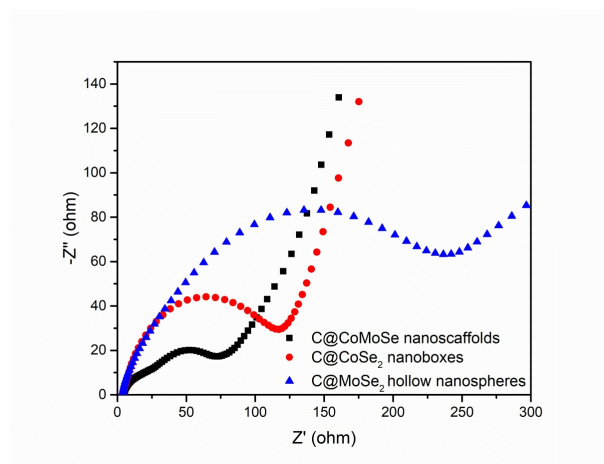

**Fig. S20** Nyquist plots of the CoMoSe@C nanoscaffolds, CoSe<sub>2</sub>@C nanocubes, and MoSe<sub>2</sub>@C hollow spheres.
